# Supplementary material for: Industrially Applicable De Novo Lager Yeast Hybrids with a Unique Genomic Architecture: Creation and Characterization
Source: PubMed Central journal article supplement (PMC7848916; doi:10.1128/aem.02434-20), 2021-01-15
Supplement: AEM.02434-20-s0001.pdf [file AEM.02434-20-s0001.pdf]

## Supplemental Material

| Sample               | Absorbance (310 nm) | POF Result |
|----------------------|---------------------|------------|
| Media Blank          | <b>4.59</b>         |            |
| Ferulic Acid Control | <b>10.7</b>         |            |
| Postive control      | 6.01                | Positive   |
| Negative control     | 11.49               | Negative   |
| CBS1513              | 11.25               | Negative   |
| W3470                | 11.34               | Negative   |
| CBS12357             | 6.33                | Positive   |
| RB-1141              | 10.88               | Negative   |
| RB-1186              | 11.22               | Negative   |
| RB-2215              | 11.11               | Negative   |
| RB-2251              | 11.13               | Negative   |
| RB-2403              | 11.13               | Negative   |

Table S1: Summary of absorbance readings (310 nm) for the detection of trans-ferulic acid for different strains to determine Phenolic-Off Flavour phenotype.

|                           | <b>W3470</b> | <b>CBS1513</b> | <b>RB-1141</b> | <b>RB-1186</b> | <b>RB-2215</b> | <b>RB-2251</b> | <b>RB-2403</b> |
|---------------------------|--------------|----------------|----------------|----------------|----------------|----------------|----------------|
| Acetaldehyde (ppm)        | 22 ± 15.1    | 17 ± 3.6       | 9 ± 1.9        | 3 ± 1.2        | 22 ± 8.2       | 20 ± 10.8      | 16 ± 4.3       |
| DMS (ppb)                 | 54 ± 3.5     | 56 ± 4.2       | 41 ± 3.0       | 34 ± 12.6      | 52 ± 5.2       | 54 ± 4.8       | 67 ± 6.2       |
| Acetone (ppm)             | 1.9 ± 1.54   | 0.7 ± 0.25     | 1.0 ± 1.00     | 0.7 ± 0.05     | 1.7 ± 2.09     | 0.9 ± 0.80     | 1.5 ± 1.68     |
| 2,3-butanedione (ppb)     | 80 ± 8.3     | 90 ± 12.1      | 75 ± 7.3       | 62 ± 5.3       | 89 ± 5.8       | 82 ± 6.9       | 100 ± 6.9      |
| Ethyl acetate (ppm)       | 40 ± 0.9     | 19 ± 0.8       | 34 ± 1.1       | 35 ± 1.9       | 36 ± 1.4       | 28 ± 0.4       | 26 ± 0.3       |
| Isobutyl acetate (ppb)    | 83 ± 7.5     | 64 ± 4.8       | 113 ± 8.7      | 94 ± 15.5      | 144 ± 16.8     | 80 ± 7.2       | 68 ± 6.5       |
| Isoamyl acetate (ppb)     | 1412 ± 158.6 | 657 ± 86.2     | 1289 ± 222.1   | 1045 ± 258.1   | 1694 ± 361.2   | 1054 ± 149.3   | 740 ± 139.3    |
| Phenylethyl acetate (ppb) | 835 ± 62.4   | 592 ± 42.0     | 876 ± 44.7     | 646 ± 28.8     | 1010 ± 50.6    | 576 ± 54.4     | 353 ± 62.1     |
| Ethyl propanoate (ppb)    | 235 ± 27.2   | 348 ± 44.3     | 92 ± 6.7       | 109 ± 5.8      | 78 ± 9.2       | 167 ± 2.7      | 108 ± 3.3      |
| Ethyl butanoate (ppb)     | 111 ± 8.1    | 127 ± 7.5      | 133 ± 7.7      | 129 ± 8.0      | 114 ± 9.7      | 99 ± 11.9      | 96 ± 10.9      |
| Ethyl hexanoate (ppb)     | 180 ± 11.5   | 179 ± 27.7     | 202 ± 34.1     | 169 ± 26.5     | 161 ± 26.1     | 135 ± 16.8     | 134 ± 22.9     |
| Ethyl octanoate (ppb)     | 236 ± 20.1   | 235 ± 27.3     | 296 ± 51.8     | 271 ± 20.1     | 192 ± 27.4     | 157 ± 22.3     | 186 ± 15.0     |
| Ethyl decanoate (ppb)     | 94 ± 3.5     | 42 ± 8.3       | 115 ± 10.7     | 100 ± 29.3     | 90 ± 13.8      | 64 ± 3.4       | 72 ± 9.7       |
| N-propanol (ppm)          | 22 ± 1.8     | 25 ± 3.1       | 22 ± 1.6       | 28 ± 1.2       | 37 ± 1.7       | 32 ± 2.3       | 26 ± 2.5       |
| Isobutanol (ppm)          | 30 ± 0.5     | 48 ± 2.6       | 39 ± 0.9       | 41 ± 2.0       | 46 ± 2.1       | 42 ± 1.1       | 41 ± 0.9       |
| Active amyl alcohol (ppm) | 28 ± 0.5     | 36 ± 1.5       | 33 ± 0.7       | 28 ± 0.5       | 37 ± 0.5       | 34 ± 0.3       | 31 ± 0.6       |
| Isoamyl alcohol (ppm)     | 72 ± 2.2     | 81 ± 5.9       | 90 ± 3.0       | 86 ± 1.5       | 108 ± 2.5      | 103 ± 3.5      | 86 ± 2.6       |

Table S2: Summary of values obtained by GC-headspace analysis of all volatile compounds measured during beer fermentations. Values are shown plus/minus one standard deviation from quadruplicate fermentations.
